# Supplementary material
Source: publisher figshare collection journal article supplement (https://tandf.figshare.com/ndownloader/files/13052456)
Supplement: Supplementary file 1 [file 13052456]

**Supplementary material to:**

**Potential evapotranspiration changes in Lancang River Basin and Yarlung Zangbo River Basin, southwest China**

Di Maa, Tianyang Wanga, Chao Gaoa, Suli Pana, Zhilin Sunb, and Yue-Ping Xua


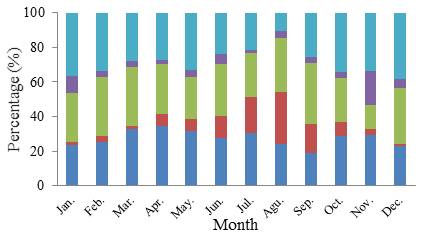

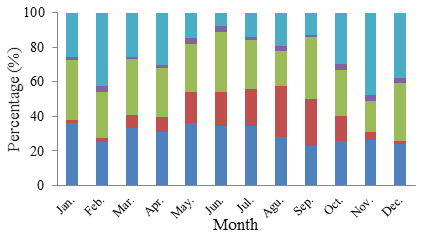

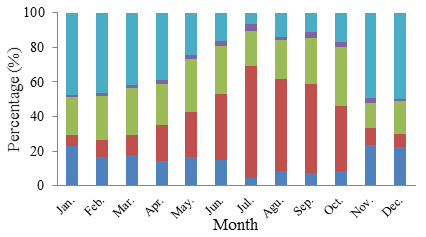

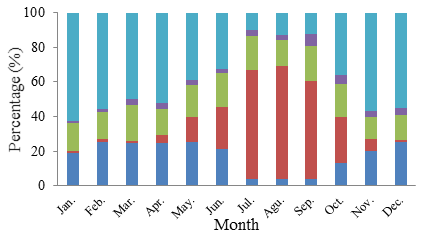

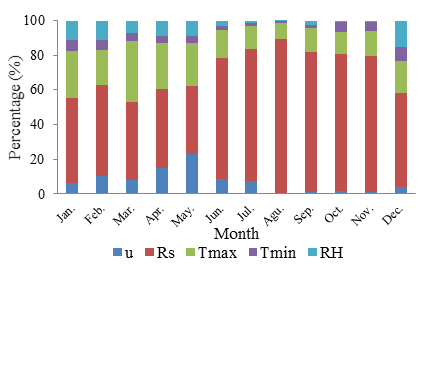

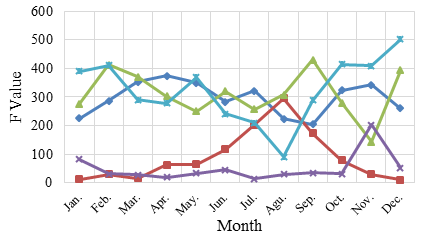

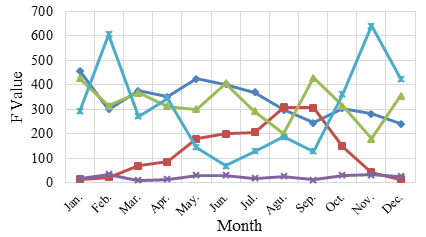

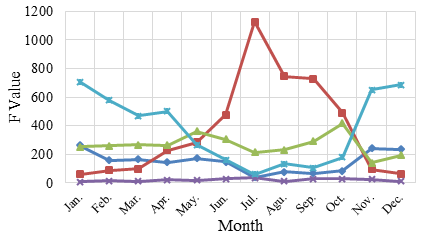

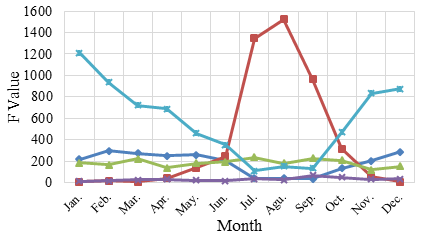

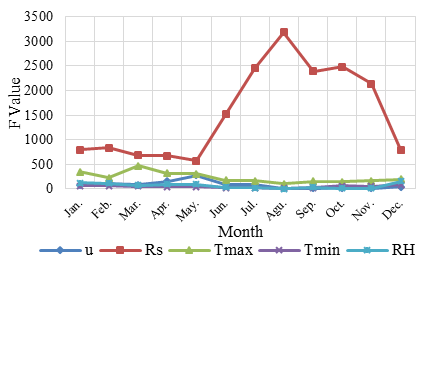


**Figure S1.** *F* values of single factors (left column) and their percentages of the total variance (right column) at a significance level of *p* = 0.05 for the five representative stations in the LRB: (a) Nangqian, (b) Changdu, (c) Weixi, (d) Dali and (e) Jinghong. u: wind speed at 2 m height; Rs:solar radiation; Tmax and Tmin: maximum and minimum air temperature, respectively; and RH: relative humidity.

(a)


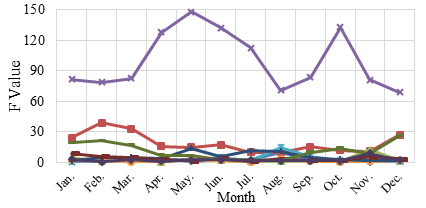

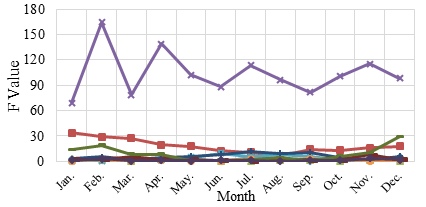

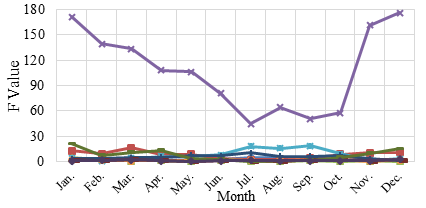

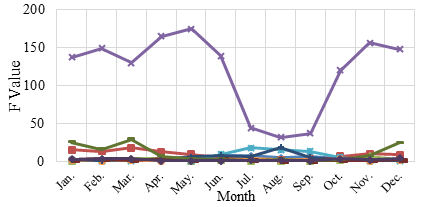

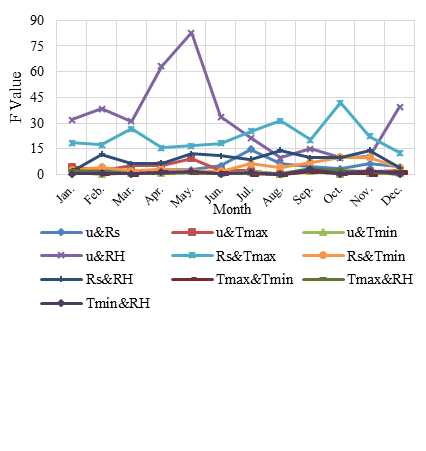

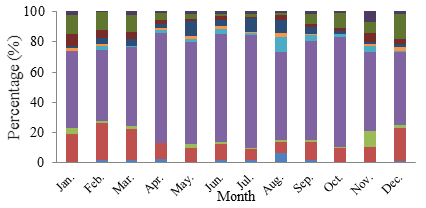

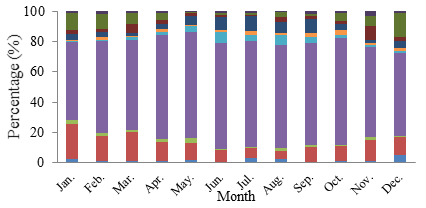

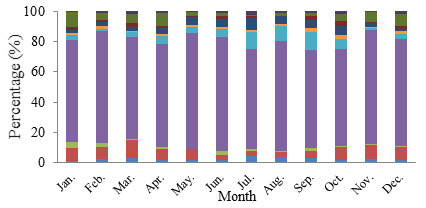

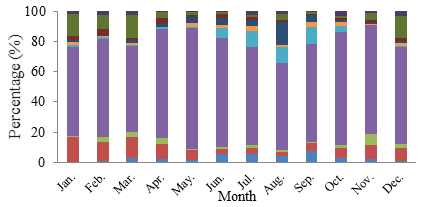

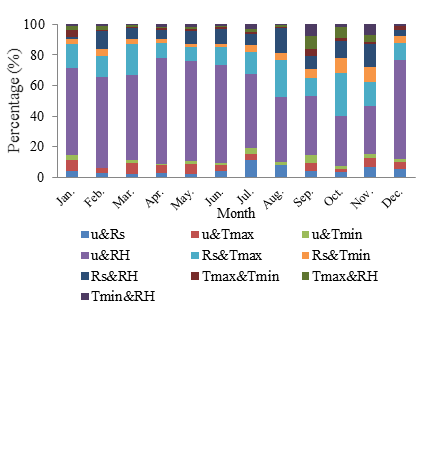


(b)

(c)

(d)

(e)

**Figure S2.** *F* values of interactions between two factors (left column) and their percentages of the total variance (right column) at a significance level of *p* = 0.05 for the five representative stations in the LRB: (a) Nangqian, (b) Changdu, (c) Weixi, (d) Dali and (e) Jinghong. See Fig. S1 caption for definition of variables.

(a)


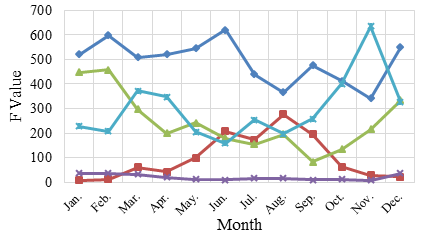

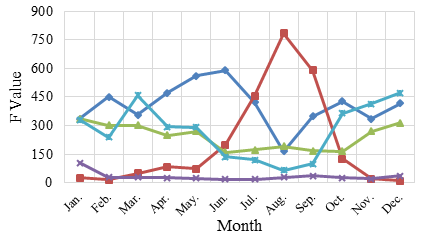

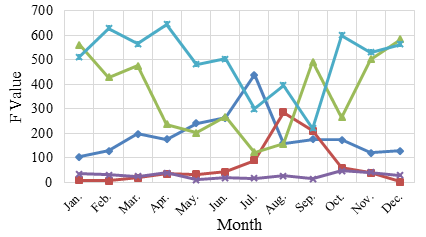

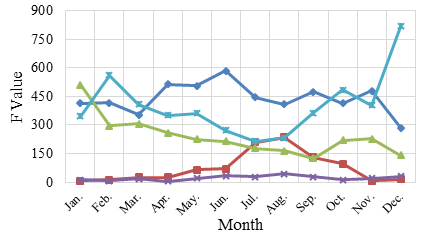

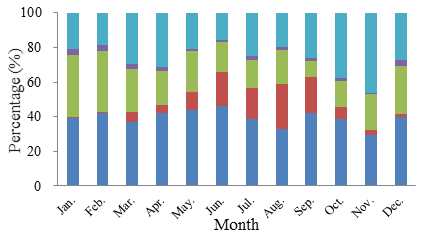

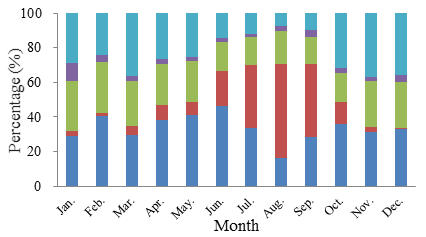

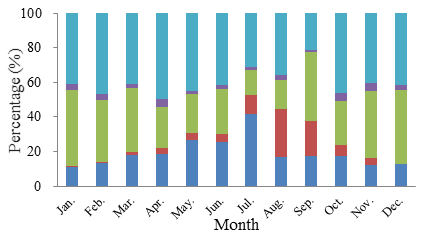

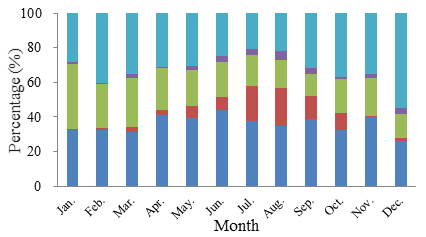

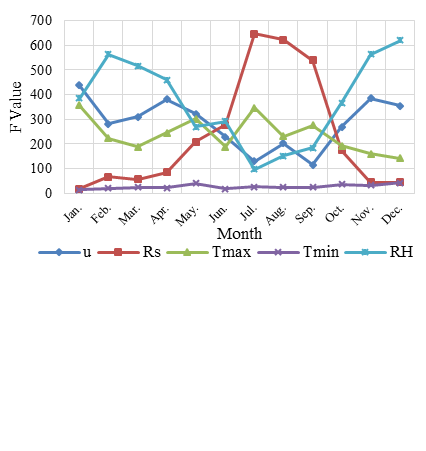

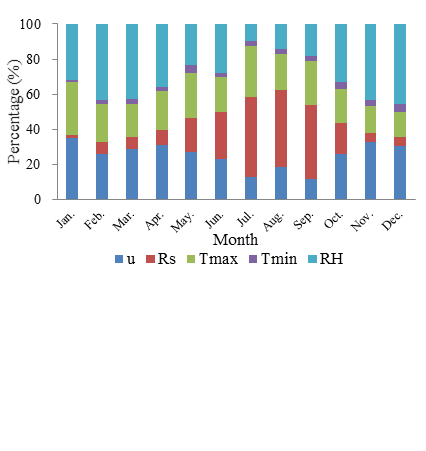


(b)

(c)

(d)

(e)

**Figure S3.** *F* values of single factors (left column) and their percentages of the total variance (right column) at a significance level of *p* = 0.05 for the five representative stations in the YRB: (a) Lhazê, (b) Shigatse, (c) Damxung, (d) Zetang and (e) Nyingchi. See Fig. S1 caption for definition of variables.

(a)


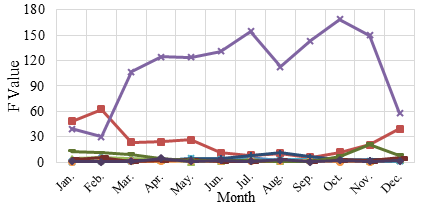

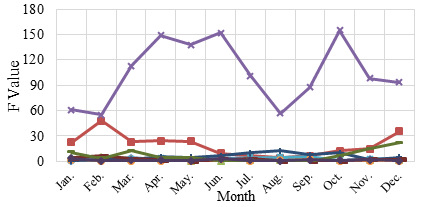

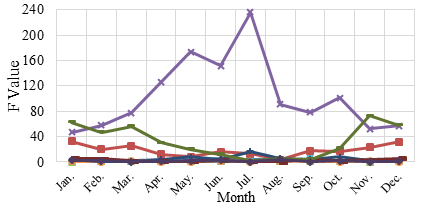

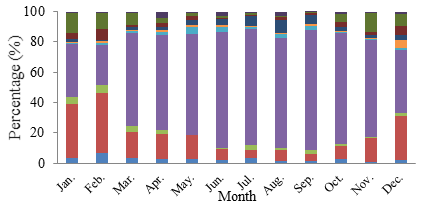

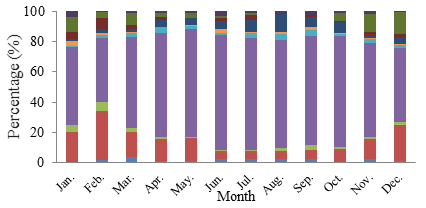

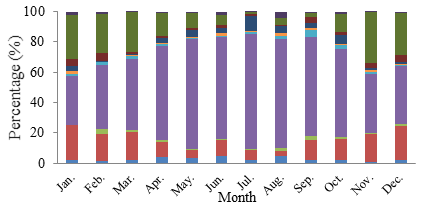

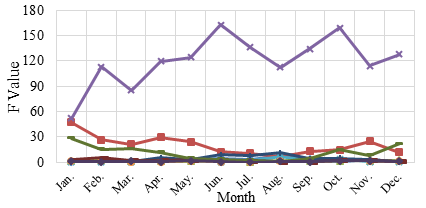

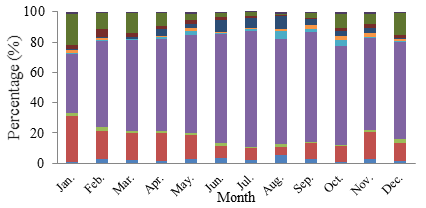

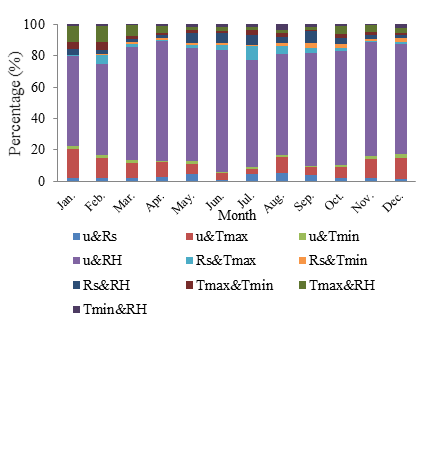

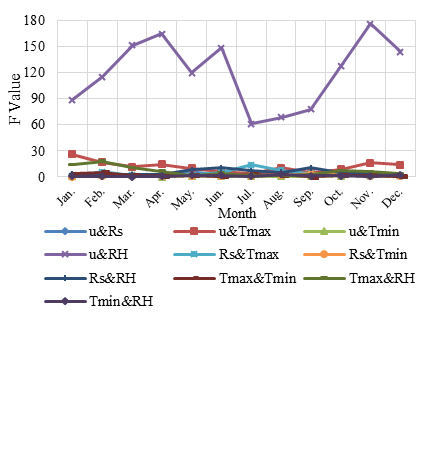


(b)

(c)

(d)

(e)

**Figure S4.** *F* values of interactions between two factors (left column) and their percentages of the total variance (right column) at a significance level of *p* = 0.05 for the five representative stations in the YRB: (a) Lhazê, (b) Shigatse, (c) Damxung, (d) Zetang and (e) Nyingchi. See Fig. S1 caption for definition of variables.
